# Supplementary material
Source: PubMed Central journal article supplement (PMC1483165)

### On line Supplementary Data

#### Online Figure Legends

#### Figure 1. Characteristics of DP-deficient HL-1 cells:

- A. Detection of apoptosis by DNA laddering in the experimental groups.
- B. Detection of p19 fragment of Caspase 3 in experimental groups by immunoblotting (upper panel). The lower panel shows an immunoblot for  $\alpha$ -tubulin as a control for loading conditions.
- C. Detection of apoptosis by TUNEL assay. DAPI-stained nuclei, TUNEL-positive cells and the overlay panels are shown in DP-competent (upper panels) and DP-deficient cells (lower panels).
- D. Detection of proliferating nuclear cell antigen (PCNA) by immunofluorescence staining. DAPI-stained nuclei, PCNA-positive cells and the overlay panels are shown in DP-competent (upper panels) and DP-deficient cells (lower panels).
- E. Quantification of TUNEL-positive cells in the experimental groups.
- F. Quantification of PCNA-positive cells in the experimental groups.
- G. Cell doubling time in DP-deficient and DP-competent HL-1 cells.

#### Figure 2. Impaired cardiogenesis in DP<sup>-/-</sup> mice:

- A. Whole mount DP<sup>+/+</sup> (WT/WT) DP<sup>+/-</sup> (WT/floxed and  $\alpha$ -MyHC) and DP<sup>-/-</sup> (floxed/floxed and  $\alpha$ -MyHC) embryos at E15.5. DP<sup>-/-</sup> embryos show growth arrest and are smaller.
- B. H&E staining of sections of whole mount embryos. Myocytes are dispersed without forming cardiac chambers (H) in pericardial sac in DP<sup>-/-</sup> embryo. Red blood cells (B) are visualized in the pericardial sac in DP<sup>-/-</sup> embryos as opposed to predominant localization in cardiac chambers.

**Figure 3.** Kaplan-Meier survival curves in the three experimental groups are shown.

**Figure 4.** Heart weight/body weight ratios in the three experimental groups are shown.

**Table 1. Sequence of Oligonucleotide primers used in this study**

| <b>Gene Symbol</b> | <b>Forward</b>           | <b>Reverse</b>            | <b>Reaction</b> |
|--------------------|--------------------------|---------------------------|-----------------|
| Adiponectin        | CTGTTCTCTTAATCCTGCCAGT   | GCGATACATATAAGCGGCTTCTCC  | RT-PCR          |
| $\beta$ -catenin   | GTAAACTCCTGCACCCACCATC   | TGGGAGAATAAAGCAACTGCACA   | RT-PCR          |
| Desmoplakin        | CTGCTCTATGACTGGAGCGACAA  | GTTTACCAAGTTCTGCACCTGAGG  | RT-PCR          |
| GAPDH              | GGTGAAGGTCGGTGTGAACG     | CCGTGAGTGGAGTCATACTGGAAC  | RT-PCR          |
| Perilipin          | GAACGTGCTCCAGAGAGTTCTGC  | GTAGAGATGGTGCCCTTCAGTTCAG | RT-PCR          |
| Plakoglobin        | ATACCTGTGTGCCCTCTGTAAGCA | CAGCTCTGCATCATCCTGGTAGTT  | RT-PCR          |
| C/EBP- $\alpha$    | TCCTGGGTGAGTTCATGGAGAAT  | GGCTGGCGACATACAGTACACAC   | RT-PCR          |
| PPAR- $\gamma$     | TGATGCACTGCCTATGAGCACTT  | CATTGGGTCAGCTCTTGTGAATG   | RT-PCR          |
| c-myc              | GAGCTGTTTGAAGGCTGGATTTC  | GCTCTGCTGTTGCTGGTGATAGA   | RT-PCR          |
| Cyclin D1          | CGTACCCTGACACCAATCTCCTC  | AGGAAGCGGTCCAGGTAGTTCAT   | RT-PCR          |
| LPL                | GAAAGGGCTCTGCCTGAGTTGTA  | GTGAAGGGAATGTTCTCGCTCTC   | RT-PCR          |
| Cardiac actin      | GTAGGTGATGAAGCCCAGAGCAA  | GAGTTACACCATCGCCAGAATCC   | RT-PCR          |
| Collagen 1a1       | CTGGTGAATCTGGACGTGAGG    | CTCAAGGTCACGGTCACGAAC     | RT-PCR          |
| Collagen 1a2       | CCATTCCTGGTGCTGTAGGTG    | CTAGAGCCAGGGAGACCCAGA     | RT-PCR          |
| Collagen 3a1       | CCTGGTGCTTCTGGTTCTCCT    | GGTCCAGCTATTCCAGGGTTG     | RT-PCR          |
| Desmoplakin        | TAAGCTCCCCTCACTTCTCCAG   | TTCTCTTTGTCTGTTGCCATGT    | PCR genotyping  |
| $\alpha$ -MHC-Cre  | CCACACCAGAAATGACAGACAGA  | CGCATAACCAGTGAAACAGCAT    | PCR genotyping  |
| Desmoplakin        | CCATGTTTTAGTAGAAGGTTTGCT | AATCCCAAGTGAGGGAATTGTT    | Southern probe  |
| siRNA DP-799       | AACACCAACATCGCTCAGAAG    |                           | RNAi            |
| siRNA DP-1102      | AAATACCCCTGTGACAAGAAT    |                           | RNAi            |

**Table 2: Electrophysiological Findings**

| <b>Phenotype</b>  | <b>WT</b>    | <b>WT/F-Cre</b> | <b>p</b> |
|-------------------|--------------|-----------------|----------|
| N                 | 5            | 5               | NA       |
| Age (months)      | 9.0 ± 0.6    | 8.80 ± 1.1      | 0.734    |
| M/F               | 3/2          | 4/1             | 0.487    |
| Body Weight (g)   | 32.40 ± 2.53 | 31.60 ± 3.36    | 0.684    |
| P duration (msec) | 10.20 ± 1.30 | 10.20 ± 1.79    | 1.00     |
| PR interval       | 34.40 ± 3.85 | 36.40 ± 5.41    | 0.522    |
| QRS duration (ms) | 12.20 ± 0.84 | 12.80 ± 0.84    | 1.00     |
| QT interval       | 24.80 ± 2.86 | 25.60 ± 1.67    | 0.609    |
| SCL (msec)        | 104.2 ± 15.4 | 106.0 ± 20.8    | 0.881    |
| HR (bpm)          | 583.2 ± 73.4 | 580.0 ± 98.3    | 0.955    |
| AVW               | 74.0 ± 15.2  | 76.00 ± 9.62    | 0.812    |
| AV 2:1            | 62.0 ± 11.0  | 75.00 ± 7.07    | 0.160    |
| cSNRT             | 31.6 ± 17.2  | 29.8 ± 10.6     | 0.849    |
| AERP              | 42.0 ± 11.0  | 45.0 ± 7.07     | 0.625    |
| AVNERP            | 51.0 ± 10.8  | 57.5 ± 11.9     | 0.430    |
| VERP              | 32.0 ± 7.58  | 35.0 ± 5.0      | 0.488    |
| Vent. Arrhythmias | 0/5          | 4/5             | 0.004    |

**Abbreviations:** WT: Wild type; F: Floxed allele; Cre: Cre recombinase; M/F: Male/Female ratio; SCL: Sinus cycle length; HR: Heart rate; AVW: Atrioventricular Wenckebach; AV 2:1: Atrioventricular 2:1 block; cSNRT: Corrected sinus node recovery time; AERP: Atrial effective refractory period; AVNERP: Atrioventricular effective refractory period; VERP: ventricular effective refractory period; Vent arrhythmias: Ventricular arrhythmias

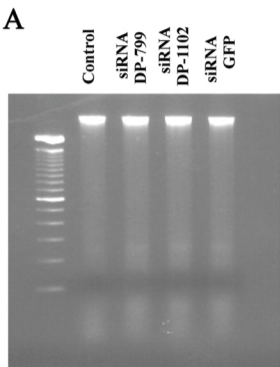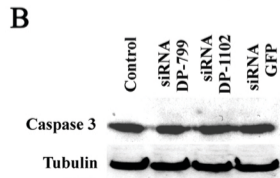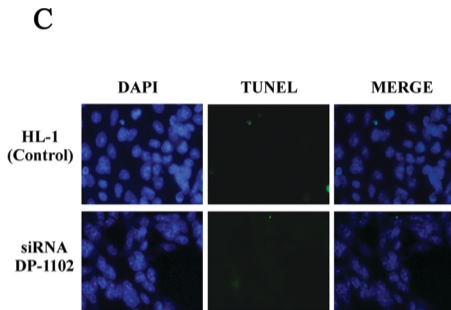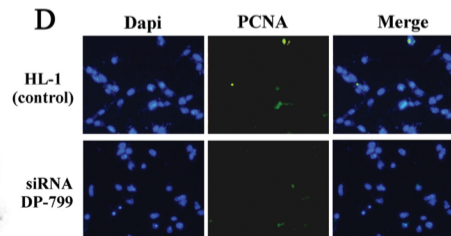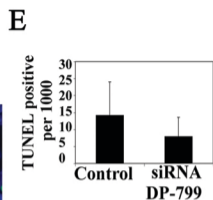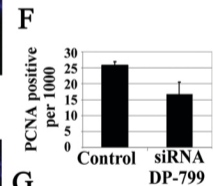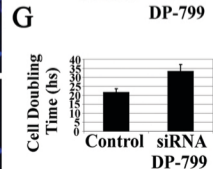



Supplemental Figure 3

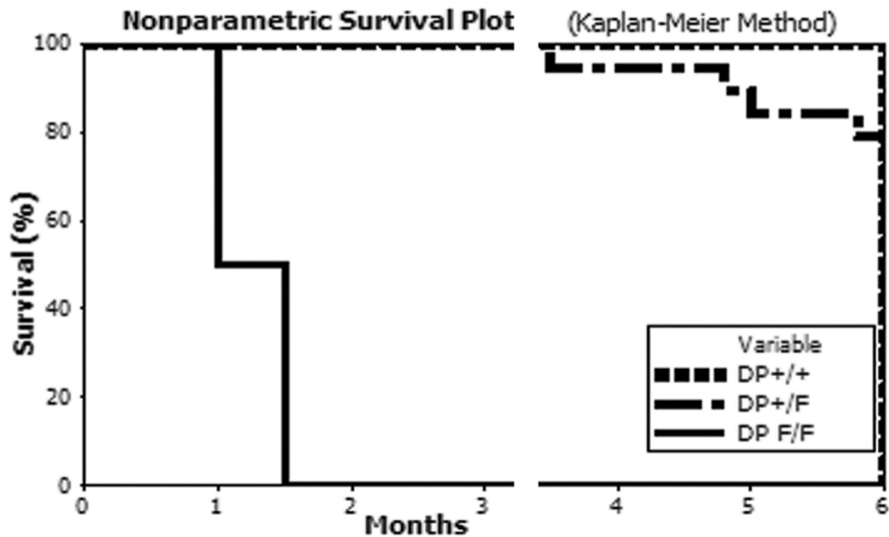

Supplemental Figure 4

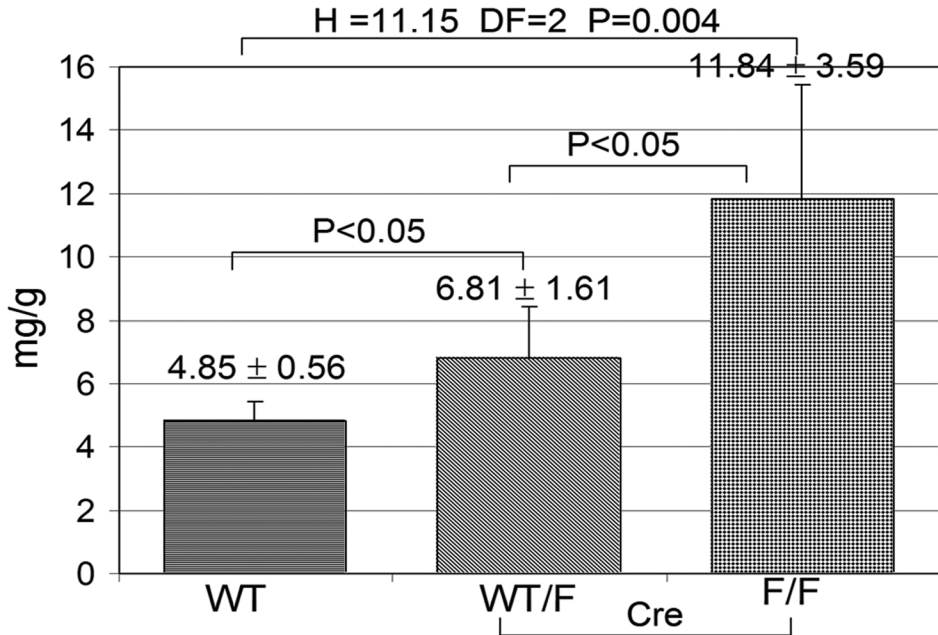

Supplement: JCI0627751sd.pdf [file JCI0627751sd.pdf]
